# Supplementary material for: Engineering WS2–Au–HRP-assisted multiple signal amplification strategy for chemiluminescence immunoassay of prostate specific antigen
Source: Royal Society of Chemistry journal article supplement (doi:10.1039/d1nj01811f), 2021-01-01
Supplement: d1nj01811f1.pdf [file d1nj01811f1.pdf]

1 Electronic Supplementary Material (ESI) for New Journal of Chemistry.

2 This journal is © The Royal Society of Chemistry and the Centre National de la

3 Recherche Scientifique 2018

4

5 **Engineering WS<sub>2</sub>-Au-HRP assisted-multiple signal amplification strategy**

6 **for chemiluminescence immunoassay of prostate specific antigen**

7 Jun-Tao Cao<sup>a,c,\*</sup>, Li-Zhen Zhao<sup>a</sup>, Wen-Sheng Zhang<sup>a</sup>, Shu-Hui Ma<sup>b</sup>, and Yan-Ming

8 Liu<sup>a,\*</sup>

9 <sup>a</sup>College of Chemistry and Chemical Engineering, Institute for Conservation and Utilization of

10 Agro-bioresources in Dabie Mountains, Xinyang Normal University, Xinyang 464000, P. R.

11 China

12 <sup>b</sup>Xinyang Central Hospital, Xinyang 464000, P. R. China

13 <sup>c</sup>Shandong Key Laboratory of Biochemical Analysis, Qingdao University of Science and

14 Technology, Qingdao 266042, China

15 Corresponding Authors: \*Phone/Fax: +86-376-6392889. E-mail addresses: liuym9518@sina.com

16 (Y.-M. Liu) and jtcao11@163.com (J.-T. Cao).

17

18

19

20

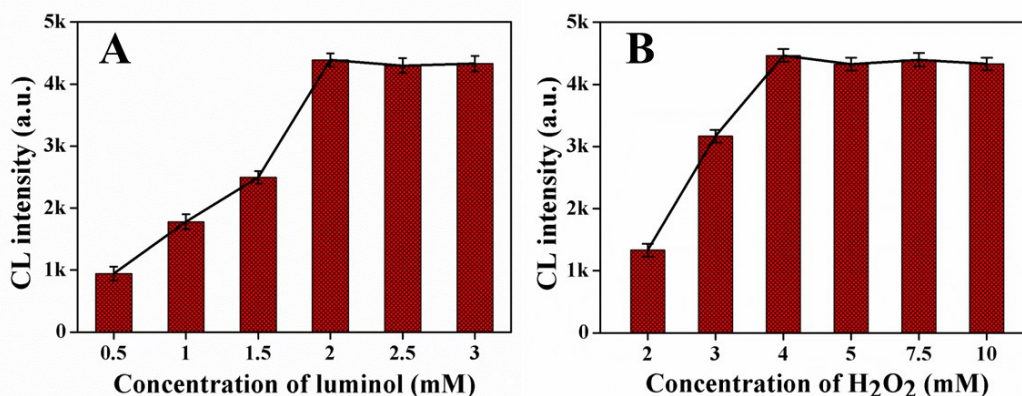

21

22 **Fig. S1.** Effects of luminol (A) and H<sub>2</sub>O<sub>2</sub> (B) concentrations on the CL intensity.

23

24

1

2

3 **Table S1.** Recovery of PSA in two human serum samples.

| Serum<br>Sample No. | Found<br>(ng/mL) | Added<br>(ng/mL) | Total found<br>(ng/mL) | Recoveries<br>(%) | RSDs<br>(%, <i>n</i> = 3) |
|---------------------|------------------|------------------|------------------------|-------------------|---------------------------|
| 1                   | 1.32             | 0.1              | 1.33                   | 100.0             | 6.3                       |
|                     |                  | 1.0              | 1.43                   | 110.0             | 3.1                       |
|                     |                  | 10.0             | 2.35                   | 103.0             | 4.7                       |
| 2                   | 6.31             | 0.1              | 6.40                   | 90.0              | 5.2                       |
|                     |                  | 1.0              | 7.43                   | 112.0             | 2.5                       |
|                     |                  | 10.0             | 15.98                  | 96.7              | 3.9                       |

4
